# Supplementary material for: GlyLES: Grammar-based Parsing of Glycans from IUPAC-condensed to SMILES
Source: Springer Nature journal article supplement (doi:10.1186/s13321-023-00704-0), 2023-03-23
Supplement: 13321_2023_704_MOESM3_ESM.pdf [file 13321_2023_704_MOESM3_ESM.pdf]

## Error messages and explanations for the GlyLES Python Package

| Message (concrete form might vary as error message depends on the input)                                | Explanation of why the input is wrong (not what to correct)                                                                                                     | Command                               |
|---------------------------------------------------------------------------------------------------------|-----------------------------------------------------------------------------------------------------------------------------------------------------------------|---------------------------------------|
| Anhydro functional groups should have exactly two numbers: X,Y-Anhydro-...                              | An anhydro-groups should be given with two indices indicating which oxygens to react.                                                                           | <code>convert("3-Anhydro-Gal")</code> |
| There is no oxygen, nitrogen, and hydrogen attached to C<i>! No functional group can be attached there! | The IUPAC-condensed string intends to attach a functional group to some position that cannot take that kind of modification.                                    |                                       |
| GlyLES can only link monomers with N-glycosidic linkages and O-glycosidic linkages.                     | Linking a monosaccharide to a carbon of another monosaccharide that cannot take a linkage at that position.                                                     | <code>convert("Man(a1-2)Dig")</code>  |
| Multiple or no options for oxygen (or other atom type) found.                                           | Linking another monomer or attaching a monomer to a carbon that does not exist.                                                                                 | <code>convert("Man(a11-2)Gal")</code> |
| C4={t6} defined modifications for carbon atoms that are not modifiable.                                 | In these special carbon chains, the modification is defined invalidly. There cannot be a trans C-C double bond at C6 if there are only 4 carbons in that chain. | <code>convert("C4={t6}Gal")</code>    |
| Glycan cannot be parsed: line 1:19 no viable alternative at input '{Gal(a1-2)Man(b1-3)]'                | IUPAC-condensed string given that is either invalid or includes features not yet implemented.                                                                   | <code>Glycan("Gal(?1-?)Man")</code>   |
